# Supplementary material for: Substituted 3-Benzylcoumarins as Allosteric MEK1 Inhibitors: Design, Synthesis and Biological Evaluation as Antiviral Agents
Source: Molecules. 2013 May 21;18(5):6057–91. doi: 10.3390/molecules18056057 (PMC6269873; doi:10.3390/molecules18056057)

# Supplementary Materials

## Biological Assays

Figure S1. Binding affinity of AZD6244 and compounds 13–18.

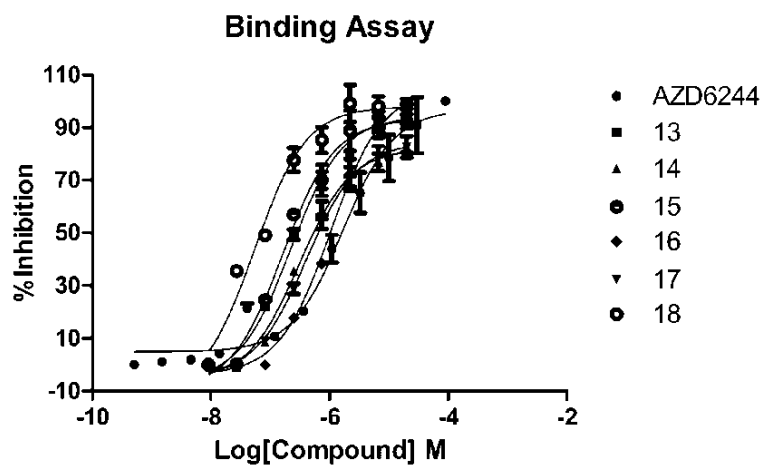

Figure S2. Binding affinity of compounds 19, 22, 25, 28, 29, 31.

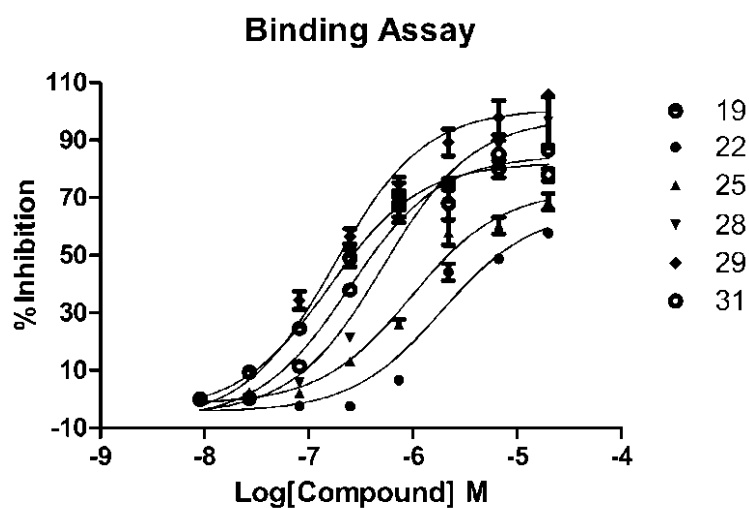

Figure S3. Binding affinity of compounds 32–36, 38–39.

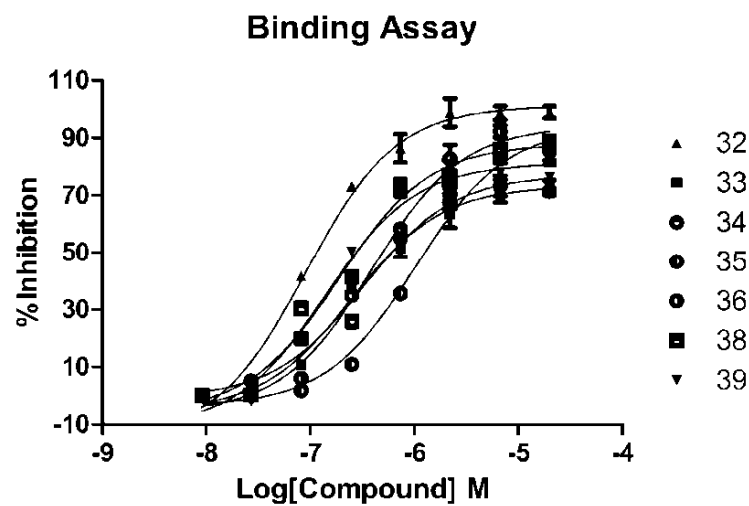

**Figure S4.** Binding affinity of compounds 40, 42, 43, 45–47.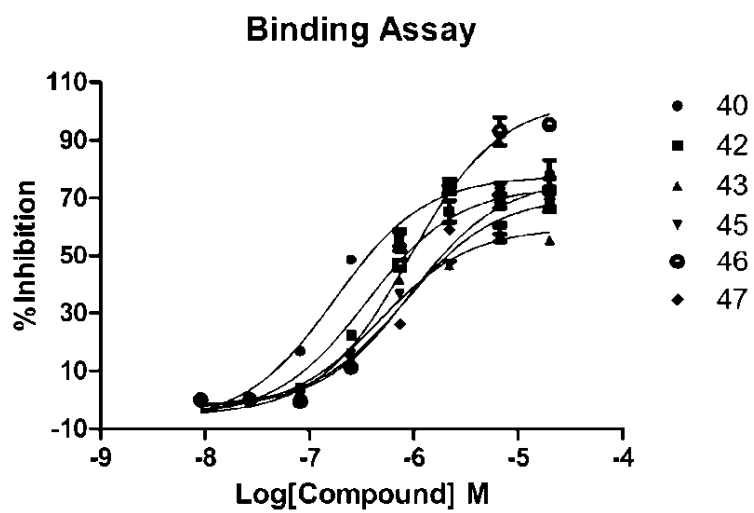

Supplement: Supplementary file 1 [file molecules-18-06057-s001.pdf]
